# Supplementary material for: Acetic Acid Treatment Enhances Drought Avoidance in Cassava (Manihot esculenta Crantz)
Source: Front Plant Sci. 2019 Apr 24;10:521. doi: 10.3389/fpls.2019.00521 (PMC6492040; doi:10.3389/fpls.2019.00521)
Supplement: Table S1 — Expression of NCED genes that play a key role in ABA biosynthesis. [file Table_1.XLSX]

## Sheet: Supplemental Table1
Supplemental Table 1 | Expression of NCED genes that play an important role in ABA biosynthesis
Encoded Proteins/other features a	FDR b	Log2 Ratio c	AGI code d	E-value	Cassava gene model e
NCED2 (At4g18350)	none
NCED3 (At3g14440)
nine-cis-epoxycarotenoid dioxygenase 3	0.947368	8.51289e-05	AT3G14440.1	0	Manes.03G083500
nine-cis-epoxycarotenoid dioxygenase 3	0.947368	0.158366	AT3G14440.1	2e-15	Manes.17G071200
nine-cis-epoxycarotenoid dioxygenase 3	0.947368	0.0108461	AT3G14440.1	0	Manes.15G102000
NCED5 (At1g30100)
nine-cis-epoxycarotenoid dioxygenase 5	0.947368	0.0645061	AT2G43800.1	6e-20	Manes.05G132200
nine-cis-epoxycarotenoid dioxygenase 5	0.947368	-0.235357	AT1G30100.1	8e-39	Manes.15G122400
NCED6 (At3g24220)
nine-cis-epoxycarotenoid dioxygenase 6	0.947368	-0.129482	AT3G24220.1	0	Manes.03G150400
nine-cis-epoxycarotenoid dioxygenase 6	0.947368	-0.100544	AT3G24220.1	0	Manes.15G050500
NCED9 (At1g78390)	none
a Encoded proteins/other features indicate the putative functions of the gene products that are expected from sequence similarity. The information for the NCBI protein reference sequence with the highest sequence similarity with the probes is shown.
b FDR by Westfall-Young multiple testing correction
c Log2 Ratio = log2 (10 mM acetic acid/control)
d The information for AGI locus ID with the highest sequence similarity with the probe is shown.
e The information for cassava gene code with the highest sequence similarity with the probe is shown.

## Sheet: Supplemental Table2
Supplemental Table 2 | Expression data of JA signaling pathway genes, such as COI1, MYCs, JAZs and JA biosynthesis pathway genes, such as AOCs
Encoded Proteins/other features a	FDR b	Log2 Ratio c	AGI code d	E-value	Cassava gene model e
COI1 (AT2G39940)
RNI-like superfamily protein	0.947368	-0.00980277	AT2G39940.1	0	Manes.07G125200
RNI-like superfamily protein	0.947368	0.183583	AT2G39940.1	0	Manes.10G017900
MYC2 (At1g32640)
Basic helix-loop-helix (bHLH) DNA-binding family protein	0.947368	0.175191	AT1G32640.1	1e-14	Manes.16G094300
Basic helix-loop-helix (bHLH) DNA-binding family protein	0.947368	0.0954857	AT1G32640.1	0	Manes.15G182700
Basic helix-loop-helix (bHLH) DNA-binding family protein	0.947368	-0.0378409	AT1G32640.1	1e-26	Manes.01G054300
Basic helix-loop-helix (bHLH) DNA-binding family protein	0.947368	0.266478	AT1G32640.1	1e-19	Manes.02G002300
Basic helix-loop-helix (bHLH) DNA-binding family protein	0.947368	-0.198379	AT1G32640.1	0	Manes.01G241700
MYC3 (At4g17880)
Basic helix-loop-helix (bHLH) DNA-binding family protein	0.947368	0.182509	AT4G17880.1	7e-24	Manes.17G016000
Basic helix-loop-helix (bHLH) DNA-binding family protein	0.947368	-0.293321	AT4G17880.1	0	Manes.02G002400
MYC4 (At5g46760)
Basic helix-loop-helix (bHLH) DNA-binding family protein	0.947368	0.149797	AT5G46760.1	4e-32	Manes.05G018200
Basic helix-loop-helix (bHLH) DNA-binding family protein	0.947368	0.0120319	AT5G46760.1	2e-11	Manes.15G182700
JAZ jasmonate-zim-domain proteins
JAZ1 (At1g19180)
jasmonate-zim-domain protein 1	0.947368	0.365557	AT1G19180.1	2e-34	Manes.04G147900
JAZ3 (At3g17860)
jasmonate-zim-domain protein 3	0.947368	-0.524106	AT3G17860.1	9e-21	Manes.06G004000
JAZ7 (At2g34600)
jasmonate-zim-domain protein 7	0.947368	-0.0674019	AT2G34600.1	6e-07	Manes.15G122900
JAZ10 (At5g13220)
jasmonate-zim-domain protein 10	0.947368	-0.430748	AT5G13220.1	1e-36	Manes.08G102800
JAZ12 (At5g20900)
jasmonate-zim-domain protein 12	0.631579	0.365156	AT5G20900.1	2e-29	Manes.16G088300
jasmonate-zim-domain protein 12	0.947368	-0.185882	AT5G20900.1	3e-25	Manes.03G055200
AOC3 (AT3G25780)
allene oxide cyclase 3	0.947368	-0.125624	AT3G25780.1	0	Manes.01G108000
AOC4 (AT1G13280)
allene oxide cyclase 4	0.947368	-0.0799403	AT1G13280.1	0	Manes.02G066600
a Encoded proteins/other features indicate the putative functions of the gene products that are expected from sequence similarity. The information for the NCBI protein reference sequence with the highest sequence similarity with the probes is shown.
b FDR by Westfall-Young multiple testing correction
c Log2 Ratio = log2 (10 mM acetic acid/control)
d The information for AGI locus ID with the highest sequence similarity with the probe is shown.
e The information for cassava gene code with the highest sequence similarity with the probe is shown.
